1     **NK cells negatively regulate CD8 T cells to promote immune**  
2             **exhaustion and chronic *Toxoplasma gondii* infection**

3     Daria L. Ivanova<sup>1,2</sup>, Ryan Krempels<sup>1</sup>, Stephen L. Denton<sup>1</sup>, Kevin D. Fettel<sup>1</sup>, Giandor M.  
4     Saltz<sup>1</sup>, David Rach<sup>1</sup>, Rida Fatima<sup>1</sup>, Tiffany Mundhenke<sup>1,2</sup>, Joshua Materi<sup>1</sup>, Ildiko R.  
5     Dunay<sup>3</sup> and Jason P. Gigley<sup>1,\*</sup>

6     Author affiliations: 1. Molecular Biology, University of Wyoming, Laramie, 82071, WY,  
7     United States, 2. Department of Immunology and Microbiology, University of Colorado  
8     Anschutz Medical Campus, Aurora, CO 80045, United States, 3. Institute of  
9     Inflammation and Neurodegeneration, Otto-von-Guericke Universität Magdeburg, D-  
10    39120, Germany. \* Correspondence: [jgigley@uwyo.edu](mailto:jgigley@uwyo.edu)

11

12    **Abstract**

13    NK cells regulate CD4+ and CD8+ T cells in acute viral infection, vaccination and the  
14    tumor microenvironment. NK cells also become exhausted in chronic activation settings.  
15    The mechanisms causing these ILC responses and their impact on adaptive immunity are  
16    unclear. CD8+ T cell exhaustion develops during chronic *Toxoplasma gondii* (*T. gondii*)  
17    infection resulting in parasite reactivation and death. How chronic *T. gondii* infection  
18    impacts the NK cell compartment is not known. We demonstrate that NK cells do not  
19    exhibit hallmarks of exhaustion. Their numbers are stable and they do not express high  
20    PD1 or LAG3. NK cell depletion with anti-NK1.1 is therapeutic and rescues chronic *T.*  
21    *gondii* infected mice from CD8+ T cell exhaustion dependent death, increases survival  
22    after lethal secondary challenge and reduces parasite reactivation. Anti-NK1.1 treatment  
23    increased polyfunctional CD8+ T cell responses in spleen and brain and reduced CD8+ T

24 cell apoptosis. Chronic *T. gondii* infection promotes the development of a modified NK  
25 cell compartment, which does not exhibit normal NK cell behavior. This splenic CD49a-  
26 CD49b+NKp46+ NK cell population develops during the early chronic phase of infection  
27 and increases through the late chronic phase of infection. They are Ly49 and TRAIL  
28 negative and are enriched for expression of CD94/NKG2A and KLRG1. They do not  
29 produce IFN $\gamma$ , are IL-10 negative, do not increase PDL1 expression, but do increase  
30 CD107a on their surface. They are also absent from brain. Based on the NK cell receptor  
31 phenotype we observed NKp46 and CD94-NKG2A cognate ligands were measured.  
32 Activating NKp46 (NCR1-ligand) ligand increased and NKG2A ligand Qa-1b expression  
33 was reduced. Blockade of NKp46 also rescued the chronically infected mice from death.  
34 Immunization with a single dose non-persistent 100% protective *T. gondii* vaccination  
35 did not induce this cell population in the spleen, suggesting persistent infection is  
36 essential for their development. We hypothesize chronic *T. gondii* infection induces an  
37 NKp46 dependent modified NK cell population that reduces functional CD8+ T cells to  
38 promote persistent parasite infection in the brain. NK cell targeted therapies could  
39 enhance immunity in people with chronic infections, chronic inflammation and cancer.

40

## 41 **Introduction**

42 *Toxoplasma gondii* (*T. gondii*) is an obligate intracellular protozoan that is the 3<sup>rd</sup>  
43 leading cause of foodborne illness in the U.S.[1] At least one-third of the human  
44 population is infected with this parasite and it is a major health concern for people who  
45 become immune compromised and in the developing fetus[2; 3]. Presently, there are no  
46 vaccines or drugs available to prevent or eliminate this infection and infection with this

47 parasite is life long [4; 5]. *T. gondii* infection induces a potent cell mediated response that  
48 is initiated by the production of IL-12 which helps activate CD8+ T cells to produce  
49 IFN $\gamma$ [6; 7; 8; 9]. CD8+ T cell IFN $\gamma$  production is the major mediator of this infection.  
50 Despite induction of a robust Th1 response, the parasite is never cleared. The  
51 immunological reason why this infection is not cleared is still unknown.

52 In mouse models of chronic *T. gondii* infection the parasite can spontaneously  
53 reactivate causing the development of toxoplasmic encephalitis (TE) and death [10].  
54 Parasite reactivation has been attributed to the development of immune exhaustion of  
55 parasite specific CD8+ T cells[10; 11; 12; 13]. The CD8+ T cells in mice harboring  
56 chronic *T. gondii* infection exhibit immune exhaustion characteristics similar to persistent  
57 viral infections[14]. Loss of activated CD8+ T cells resulting in a reduced functional cell  
58 population, expression of high levels of programmed death 1(PD1) and increased  
59 apoptosis of CD8+ T cells. This loss of functional CD8+ T cells results in parasite  
60 reactivation and death of the animals. Importantly, the exhausted CD8+ T cells can be  
61 rescued with anti-PDL1 therapy during chronic *T. gondii* infection and this also prevents  
62 parasite reactivation and death. The mechanisms underlying the development of CD8+ T  
63 cell exhaustion and dysfunction during chronic *T. gondii* infection are still unclear.

64 NK cells are innate lymphoid cells (ILCs) that provide early cytotoxicity and  
65 cytokine dependent protection during infections and cancer [15]. NK cells are important  
66 for control of acute *T. gondii* infection[16; 17] and are activated early during parasite  
67 infection by IL-12[18; 19]. As a result of IL-12 signaling, NK cells produce high levels  
68 of IFN $\gamma$ , which helps control the parasite prior to T cell activation. NK cells are more  
69 complex than previously thought and appear to not only be activated and work as a

70 component of innate immunity during acute infections, but may also continue to work  
71 along side CD4+ and CD8+ T cells during the adaptive phase of immunity. NK cells  
72 have been shown to acquire memory-like features after exposure to haptens, during viral  
73 infections and after cytokine stimulation [20; 21; 22; 23]. This highlights their ability to  
74 not simply fall into the background once adaptive immunity is established, but also to  
75 continue to play a role in immunity after acute infections are resolved. NK cells have  
76 also been shown to become exhausted[24; 25; 26; 27]. This can occur in the tumor  
77 microenvironment, chronic stimulation and persistent HCV infection. In these different  
78 disease situations, NK cells become dysfunctional and as a result could contribute to the  
79 persistence of infections and reduced clearance of tumor cells. NK cells can also be  
80 negative regulators of the adaptive response during acute infections and cancer. Through  
81 several interactions including TRAIL, NKp46 and yet to be defined receptors, NK cells  
82 can lyse CD4+ and CD8+ T cells resulting in less effective adaptive responses thereby  
83 promoting pathogen and tumor persistence[28; 29; 30; 31; 32; 33]. In addition, NK cells  
84 produce IL-10 during acute systemic infections including *T. gondii* infection dampening  
85 the activation of adaptive immune responses[34]. Much of what is known about the  
86 development of these other non-protective NK cell responses is in the acute disease or  
87 infection setting and less is known about how NK cells behave during chronic infections  
88 long after acute infection is resolved.

89         Based upon the knowledge that CD8+ T cells become exhausted to promote *T.*  
90 *gondii* persistence, NK cells can remain active for long periods of time, NK cells have the  
91 potential to become exhausted and they can regulate development of adaptive immune  
92 responses we were interested to test how chronic *T. gondii* infection impacted the NK

93 cells and how did NK cells impact the outcomes of chronic toxoplasmosis. Our results  
94 indicate that NK cells are still present during chronic *T. gondii* infection. They do not  
95 exhibit characteristics of immune exhaustion. They contribute to the loss of exhausted  
96 CD8+ T cells and their removal helps maintain control of chronic *T. gondii* infection.  
97 We also demonstrate that NK cells develop a unique phenotype that supports the  
98 hypothesis that NKp46 recognition of ligand and loss of NKG2A interaction with Qa-1b  
99 promotes the development of an NK cell population that negatively regulates CD8+ T  
100 cell function resulting in parasite reactivation and death. Our data highlight that NK cells  
101 could be therapeutic targets to enhance long-term immunity to chronic *T. gondii*  
102 infection.

103

#### 104 **Materials and methods**

##### 105 *Mice*

106 C57BL/6 (B6), B6.129S6-IL-10<sup>tm1Flv</sup>/J (IL-10-GFP Tiger) mice were purchased from The  
107 Jackson Laboratory. All animals were housed under specific pathogen-free conditions at  
108 the University of Wyoming Animal Facility. This study was carried out in strict  
109 accordance following the recommendations in the Guide for the Care and Use of  
110 Laboratory Animals of the National Institutes of Health. The University of Wyoming  
111 Institutional Animal Care and Use Committee (IACUC) (PHS/NIH/OLAW assurance  
112 number: A3216-01) approved all animal protocols.

113

114 *T. gondii* parasites and infection

115 Tachyzoites of RH were cultured by serial passage in human fetal lung fibroblast (MRC5,  
116 ATCC) cell monolayers in complete DMEM (supplemented with 0.2 mM uracil for  
117 CPS strain). For mouse infections, parasites were purified by filtration through a 3.0- $\mu$ m  
118 filter (Merck Millipore Ltd.) and washed with phosphate-buffered saline (PBS). Mice  
119 were infected intraperitoneally (i.p.) with  $1 \times 10^3$  or  $1 \times 10^6$  RH tachyzoites or  $1 \times 10^6$   
120 CPS tachyzoites. The brains of CBA mice 5 weeks after ME49 infection were used as a  
121 source of ME49 cysts. Mice were infected i.p. or i.g. (intragastrically) with 10 or 200  
122 ME49 cysts.

123

#### 124 *NK Cell depletion and Nkp46 blockade in vivo*

125 To deplete NK cells, B6 mice were treated i.p. with 200  $\mu$ g of anti-NK1.1 (PK136, Bio X  
126 Cell). To block NKp46 mice were treated i.p. with 50  $\mu$ g non-depleting LEAF purified  
127 anti-NKp46 (29A1.4, Biolegend)[35]. Antibody treatments were started 5 weeks after  
128 infection with ME49 and continued every other day for 2 weeks for flow cytometry  
129 assays or until non-treated animal groups died from reactivation of *T. gondii*.

130

#### 131 *Brain and spleen T cell isolation and stimulation*

132 Single-cell suspensions of brain and spleen were prepared from mice. To harvest brain  
133 lymphocytes and assess their phenotype and function, mice were anesthetized and  
134 perfused with 20 mls of 0.9% saline with heparin as described[36]. Brains were then  
135 homogenized in 1 X PBS using a dounce homogenizer. Brains were pelleted by  
136 centrifugation then homogenates were added to 30% percoll® and centrifuged at 2000xg  
137 for 20 minutes at 15°C to collect lymphocytes from the pellet. Brain lymphocytes were

138 then plated at  $0.5\text{--}1.5 \times 10^6$  cells/well in complete Iscove's DMEM medium (10% FBS,  
139 Na Pyruvate, non essential amino acids, penicillin,  $\beta$ -2 Mercaptoethanol) (Corning).  $0.5$   
140  $\times 10^6$  congenically marked CD45.1 splenocytes were also added to the brain lymphocyte  
141 wells as feeder cells for antigen restimulation. Spleens were crushed through 70  $\mu$ m cell  
142 strainers (VWR) in 1 X PBS. Splenocytes were then treated with 3 ml of RBC lysis  
143 buffer for 3 minutes at 37C to lyse erythrocytes, washed then resuspended in complete  
144 Iscoves DMEM. Spleen cells were plated at  $1 \times 10^6$  cells per well. Brain and spleen cells  
145 were then pulsed with 20 $\mu$ g/ml Toxoplasma lysate antigen (TLA) for 8 hours and  
146 cultured at 37C in 5% CO<sub>2</sub>. After 8 hours, 1X protein transport inhibitor cocktail (PTIC)  
147 containing Brefeldin A/Monensin (eBioscience, Thermo Fisher Scientific) with or  
148 without anti-CD107a (eBio1D4B, eBioscience, Thermo Fisher Scientific) was added to  
149 each well in complete Iscove's DMEM medium (Corning). After 4 hours incubation at  
150 37C in 5% CO<sub>2</sub>, cells were prepared for flow cytometry.

151

#### 152 *ILC functional assays.*

153 For ILC function assays, spleen cells were stimulated for 4 h with plate bound anti-  
154 NK1.1 in the presence of 1 $\times$  protein transport inhibitor cocktail (PTIC) containing  
155 Brefeldin A/Monensin (eBioscience, Thermo Fisher Scientific) and anti-CD107a  
156 (eBio1D4B, eBioscience, Thermo Fisher Scientific) in complete Iscove's DMEM  
157 medium (Corning). Cells were incubated during stimulation at 37C in 5% CO<sub>2</sub> for 4  
158 hours. Cells were then first surface stained then intracellularly stained to measure  
159 function. ILC phenotypes were measured directly ex vivo. Spleen cells were stained  
160 following procedures indicated below after fixable Live/Dead staining (Invitrogen).

161

162 *Flow cytometry*

163 Single cell suspensions from brain or spleen were assayed for immune cell phenotype and  
164 functions. Phenotype assays were performed directly ex vivo after harvest. Function  
165 assays were performed after antigen pulse cells or stimulation. All flow cytometry  
166 staining was performed using the same procedure for all experiments. Cells were washed  
167 twice with PBS and stained for viability in PBS using Fixable Live/Dead Aqua  
168 (Invitrogen) for 30 min. After the cells were washed with PBS, surface staining was  
169 performed using antibodies diluted in stain wash buffer (2% fetal bovine serum in PBS  
170 and [2 mM] EDTA) for 25 min on ice in the presence of 2.4G2 FcR blockade to reduce  
171 non-specific staining. For phenotype analysis cells were then fixed for 10 minutes using  
172 fixation/permeabilization solution (BD biosciences). For functional assays after fixable  
173 live/dead and surface staining, the cells were fixed and permeabilized for 1 h on ice in  
174 Fixation/Permeabilization solution (BD Bioscience), followed by intracellular staining in  
175 1 X permeabilization wash buffer (BD Bioscience) with anti-IFN $\gamma$  and anti-granzyme B  
176 (XMG1.2, NGBZ, eBioscience, Thermo Fisher Scientific) for 45 min. Antibodies used  
177 for surface staining were against: CD3 (17A2), CD49b (DX5), CD49a (HM $\alpha$ 1), NKp46  
178 (29A1.4), NK1.1(PK136) , CD4 (RM4-5), CD8b (YTS156.7.7), KLRG1 (2F1/KLRG1),  
179 2B4 (m2B4), Ly49I (YLI-90), Ly49H (3D10), CD94 (18d3), NKG2AB6 (16A11), LAG3  
180 (C9B7W), PD1 (29F.1A12) , PDL1(10F.9G2), CD107a (1D4B), CD45.1 (A20),  
181 CD45.2 (104). These antibodies were from Biolegend. Anti-Qa-1b (6A8.6F10.1A6) was  
182 from eBiosciences and anti-Ly49D (4E5) was from BD Biosciences. NKp46 (NCR1)  
183 ligand was stained using the soluble NKp46 receptor fused to human Fc (NCR1-hFc,



184 RND systems). Bound soluble receptor was then detected using a secondary antibody  
185 anti-human IgG (). To assess apoptosis, cells were also stained using Annexin V  
186 (Annexin V staining kit, Biolegend). The cells were resuspended in 1 X PBS and  
187 analyzed using Guava easyCyte 12HT flow cytometer (Millipore-SIGMA) and FlowJo  
188 software (Tree Star).

189

### 190 *Cyst burdens*

191 Cyst burdens were quantified using microscopy. Brains of mice infected with Type II  
192 strain ME49 were harvested and homogenized with a dounce homogenizer in 2 mls of 1  
193 X PBS. 10 uls of homogenized brain was placed onto a microscope slide and covered  
194 with a cover slip. Microscope slides were examined and cysts in the homogenate were  
195 counted. A minimum of 5 slides per mouse was counted.

196

### 197 *Survival studies.*

198 WT B6 mice were infected with 10 cysts i.g. of the type II parasite strain ME49. After 5  
199 weeks of infection mice were treated or not i.p. with 200 ug anti-NK1.1 (PK136,  
200 BioXCell) or 50 ug LEAF purified anti-NKp46 (Biolegend). Mouse treatments were  
201 performed every other day until completion of experiments. Mice were monitored daily  
202 for morbidity and mortality. Mice were evaluated on a 1-5 scale with 5 indicating highest  
203 morbidity. Mice reaching a level 5 score are not moving, severely hunched, eyes shut  
204 and not eating or drinking. Mice were sacrificed prior to death and after they reached  
205 level 5 clinical score for no more than 24 hours. For survival experiments after  
206 rechallenge, ME49 infected animals were treated or not with anti-NK1.1 (PK136,

207 BioXcell). After the 2<sup>nd</sup> dose of anti-NK1.1 mice were challenged with either a lethal  
208 dose 200 cysts of ME49 i.g. or 1000 tachyzoites of the type I highly virulent strain RH  
209 i.p. ILC depletion was continued every other day as in other experiments. Control mice  
210 were uninfected naïve B6 mice only given the challenge infection (either ME49 or RH).  
211 Survival of chronically infected rechallenged mice were monitored and assessed on the 1-  
212 5 scale as described above.

213

#### 214 *Statistical analysis*

215 Statistical analysis was performed using Prism 7.0d (GraphPad) and Microsoft Excel  
216 2011. Significant differences were calculated using either unpaired Student's t-test with  
217 Welch's correction or analysis of variance (ANOVA). The log-rank (Mantel-Cox) test  
218 was used to evaluate survival rate. Data is presented in graphs as the mean± standard  
219 deviation (SD). Significance is denoted as follows: ns, not significant ( $p > 0.05$ ) or  
220 significant with a maximum p-value of 0.05 or less.

221

## 222 **Results**

### 223 *NK cell exhaustion*

224 Previous studies have demonstrated that during late chronic *T. gondii* infection,  
225 CD4+ and CD8+ T cells develop immune exhaustion resulting in their dysfunction[10;  
226 12; 13]. This ultimately results in the death of B6 mice in the late chronic stage of  
227 infection due to parasite reactivation. To further dissect the immune mechanisms  
228 contributing to T cell exhaustion during late chronic *T. gondii* infection, we investigated  
229 the role of innate lymphoid cells and more specifically NK cells. NK cells can participate

230 in immune responses long after the innate response has transitioned into the adaptive  
231 response[20; 22]. NK cells acquire characteristics of memory. NK cells can also develop  
232 characteristics of immune exhaustion in the tumor microenvironment[27]. They traffic to  
233 tumor sites, have reduced numbers, effector function and upregulate PD1 expression on  
234 their surface. Based on the ability of NK cells to contribute to immunity after the innate  
235 response is over and their potential to develop immune exhaustion we determined  
236 whether NK cells were still in abundance during late chronic *T. gondii* infection and their  
237 immune exhaustion status. Mice were infected with 10 cysts of the Type II *T. gondii*  
238 strain ME49, known to induce T cell exhaustion during long-term infection. At week 5  
239 and 7 post infection spleens were harvested and NK cell frequencies and numbers were  
240 measured using flow cytometry. Lineage negative (CD4-CD8-) cells were analyzed for  
241 CD49b+ cells. As shown in Figure 1A, the frequencies and absolute numbers of splenic  
242 NK cells (CD4-CD8-CD49b+) did not significantly decrease from week 5 to 7 post  
243 infection. As previously published week 7 is when CD4+ and CD8+ T cells decrease in  
244 both frequency and number[10; 13]. An increase in Programmed death 1 (PD1) on T  
245 cells is a hallmark of immune exhaustion. During late chronic *T. gondii* infection, both  
246 CD4+ and CD8+ T cells have been reported to increase their PD1 expression leading to  
247 loss of function of these T cells and parasite reactivation[10; 13]. To further assess  
248 whether NK cells exhibited characteristics of immune exhaustion during late chronic *T.*  
249 *gondii* infection we measured their PD1 expression. As shown in Figure 1B, the mean  
250 fluorescence intensity(MFI) of PD1 increased on both CD4+ and CD8+ T cells, however,  
251 NK cells did not increase their expression of PD1. In addition, the frequencies of CD4+  
252 or CD8+ T cell PD1 high (PD1 Hi), PD1 intermediate (PD1 Int) both increased

253 significantly at week 5 and 7 post infection (Figure 1C). The frequencies of PD1 Hi or  
254 Int did not change on NK cells over the course of infection. Another marker of  
255 exhaustion is lymphocyte activating gene 3 (LAG3) expression. LAG3 increases on  
256 CD4+ and CD8+ T cells during late chronic *T. gondii* infection[13]. We did not detect an  
257 increase in LAG3 expression (Figure 1 D)on NK cells during chronic *T. gondii* infection.  
258 Based on the results splenic NK cells do not appear to decrease in number or express PD1  
259 or LAG3 at high levels compared to CD4+ and CD8+ T cells during chronic *T. gondii*  
260 infection.

261 *NK cell role in chronic T. gondii infection.*

262 Based on results of our studies, NK cells did not appear to develop some  
263 characteristics of immune exhaustion raising the question about how might NK cells  
264 contribute to immune control of *T. gondii* during chronic infection. WT B6 mice  
265 typically succumb to spontaneous reactivation of the parasite in the CNS and die[10].  
266 Cyst reactivation in the brain can be observed via parasitemia and a decrease in cyst  
267 number in the brains of late chronic infected mice. Interestingly, blockade with anti-  
268 PDL1 antibody appears to rescue these animals from death and slow down parasite  
269 reactivation resulting in maintenance of cysts in the CNS[10; 11; 12]. To begin to  
270 address how NK cells are behaving during chronic *T. gondii* infection NK cells were  
271 depleted using anti-NK1.1 in mice starting at week 5 post infection. Mice were treated  
272 every other day until the experiment was terminated at 100 days post infection. Mice  
273 with NK cells began to succumb to the infection around week 5 (49 days) post infection  
274 (Figure 2A). Mice treated with anti-NK1.1 did not start to succumb to the infection until  
275 80 days post infection. All mice with NK cells were dead by 80 days post infection

276 whereas 50 % of mice depleted of their NK cells were still alive at 100 days post  
277 infection (Figure 2A). We next measured whether cyst burdens in the brain were  
278 maintained better when NK cells were depleted. As shown in Figure 2B, mouse brain  
279 cyst burdens were higher in mice that were depleted of NK cells than mice with NK cells.  
280 To fully test whether NK cells were inhibiting immune control of the parasite, B6 mice  
281 were infected with ME49 and at 5 weeks depleted of their NK cells or not with anti-  
282 NK1.1. 2 days after start of treatment, mice were challenged with a lethal dose of either  
283 200 cysts of ME49 i.g. or 1000 tachyzoites of RH i.p. and monitored for survival. As  
284 shown in Figure 2 C, mice with their NK cells succumbed to challenge significantly  
285 earlier than mice with NK cells depleted. This result demonstrates that NK cells appear  
286 to have a negative affect on long-term immunity to chronic *T. gondii* infection by  
287 promoting parasite reactivation and reducing the effectiveness of adaptive recall  
288 responses.

#### 289 *NK cell impact on CD8+ T cell responses*

290 Parasite reactivation and mouse death during chronic *T. gondii* infection occurs  
291 when parasite specific CD8+ T cells develop immune exhaustion[10]. Their exhaustion  
292 results in decreased frequency and number of polyfunctional (IFN $\gamma$ +CD107a+, or IFN $\gamma$   
293 Granzyme B+) CD8+ T cells in the periphery and CNS. Since depletion of NK cells  
294 during chronic *T. gondii* resulted better survival we measured how this impacted  
295 polyfunctional CD8+ T cells in the spleen and brain. Infected mice were treated starting  
296 at week 5 post infection with anti-NK1.1 for 2 weeks as in previous experiments and  
297 spleen and brain cells were assayed for the frequency and absolute number of  
298 polyfunctional CD8+ T cells. As shown in figure 3A, NK cell depletion of week 5

299 infected mice resulted in the maintenance of the frequency and absolute number of  
300 IFN $\gamma$ +CD107a+ CD8+ T cells. Similarly, in the brain, NK cell depletion starting at week  
301 5 post infection significantly increased the frequency of IFN $\gamma$ +GrzB+ CD8+ T cells.  
302 Several studies have demonstrated that during acute viral infections (MCMV, LCMV)  
303 infection, NK cells are negative regulators of priming of adaptive immune responses[29;  
304 30; 32; 33; 37; 38; 39]. This negative regulation promotes viral persistence and immune  
305 exhaustion of the T cells. However, during acute *T. gondii* infection previous studies  
306 suggest that NK cells could be positive regulators of the priming of adaptive immune  
307 responses against the parasite[40; 41; 42; 43]. Many of the earlier *T. gondii* studies used  
308 anti-asialo GM1 antibody to deplete NK cells without knowing that this antibody targets  
309 not only NK cells, but effector populations of CD8+ T cells [44]. We tested whether NK  
310 cells provided a different function during acute *T. gondii* infection and promoted priming  
311 of CD8+ T cells as compared to NK cells in chronic *T. gondii* infection, which appear to  
312 inhibit CD8+ T cell function. B6 mice were treated or not with anti-NK1.1 1 day prior  
313 to infection with ME49 strain of *T. gondii* and then infected with 10 cysts i.g. NK  
314 depleted mice were treated with anit-NK1.1 for 6 days and on day 7 all mice were  
315 harvested and their spleen CD8+ T cell functionality was measured. As shown in figure  
316 3D and E, CD8+ T cells were activated by day 7 post infection, however, NK cell  
317 depleted animals had significantly fewer activated CD8+ T cells (IFN $\gamma$ +CD107a+ plus  
318 IFN $\gamma$ +CD107a-) than mice that still have their NK cells. Thus, during acute infection NK  
319 cells are important for priming CD8+ T cells to protect against infection, but during  
320 chronic *T. gondii* infection, NK cells change their function and negatively regulate CD8+  
321 T cells to promote parasite reactivation and mouse death. To further define why

322 polyfunctional CD8<sup>+</sup> T cells were reduced during chronic *T. gondii* infection in the  
323 presence of NK cells, we measured CD8<sup>+</sup> T cell apoptosis using Annexin V staining in  
324 the presence or absence of NK cells. As presented in figure 4A, apoptosis was  
325 significantly increased in chronically infected mice at week 5 and 7 post infection. NK  
326 cell depletion significantly reduced the level of CD8<sup>+</sup> T cell apoptosis in chronically  
327 infected mice at week 7 post infection. Similar results were obtained by measuring active  
328 caspase 3/7 in CD8<sup>+</sup>T cells (data not shown). NK cells appear to contribute to parasite  
329 reactivation and CD8<sup>+</sup> T cell exhaustion during chronic *T. gondii* infection by increasing  
330 CD8<sup>+</sup> T cell apoptosis.

### 331 *NK cell phenotype during chronic T. gondii infection*

332 Published studies indicate that NK cells use several mechanisms to regulate  
333 adaptive immune responses[29; 31; 32; 33; 34; 45; 46; 47]. Many of these mechanisms  
334 rely on the expression of specific NK cell receptors, which allow the NK cells to target  
335 specific adaptive immune cell populations and induce their apoptosis, lysis or  
336 suppression. NK cell receptors are also very important for normal protective NK cell  
337 functions including Ly49H, which recognize m157 of MCMV[22; 48]. These specific  
338 interactions promote the enrichment of NK cell subpopulations expressing specific  
339 receptor combinations as was demonstrated for memory-like NK cells during MCMV  
340 infection. During acute *T. gondii* infection, we have previously published that there does  
341 not appear to be a dominant NK cell population activated. *T. gondii* infection may only  
342 induce cytokine dependent NK cell activation resulting in global activation of a large  
343 array of different IFN $\gamma$  producing and protective NK cell subpopulations [49]. In the  
344 studies presented here, NK cells appear to change their function to promote CD8<sup>+</sup> T cell

345 compartment dysfunction and parasite reactivation. This suggests the NK cell  
346 compartment could be modified and a specific NK cell subpopulation develops to erode  
347 immunity to the parasite during chronic *T. gondii* infection. To begin to define what NK  
348 cell receptors might be involved in contributing to CD8+ T cell exhaustion during  
349 chronic *T. gondii* infection, we performed an exhaustive assessment of NK cell receptor  
350 expression during week 5 chronic *T. gondii* infection. As shown in figure 5A, the NK  
351 cell compartment had significantly reduced frequencies of cells that expressed 2B4,  
352 Ly49H, Ly49D and Ly49I. This was observed on lineage – CD49b+ cells in the spleen.  
353 We did not detect any differences in TRAIL expression (data not shown). We observed  
354 significant increases in the frequencies of NK cells (lin-CD49b+) that expressed KLRG1  
355 and NKG2A (Figure 5A). The number of NK cells expressing KLRG1 also increased  
356 significantly during chronic *T. gondii* infection. The significant increase in KLRG1+ NK  
357 cells and NKG2A+ NK cells suggested these cells were being enriched within the NK  
358 cell compartment. A recent study suggests that CD49a+ ILC1 may develop from NK  
359 cells and exhibit this phenotype in the liver of mice infected with the vaccine strain of *T.*  
360 *gondii cps1-1* and a different limited cyst forming type II strain Prugniaud [50].  
361 Therefore to determine if this was also occurring in NK cells in the spleens after infection  
362 with the vaccine strain, we infected mice with *cps1-1* and 5 weeks later assayed the  
363 spleen cells for CD94+NKG2A+ NK cells. As shown in figure 5B, *cps1-1* strain  
364 parasites did not induce the same increase in frequency of CD94+ NKG2A+ NK cells as  
365 did ME49. To further investigate whether ILC1 were enriched in the NK cell  
366 compartment, we measured the frequencies of ILC1 (CD49a+CD49b-) compared to NK  
367 cells (CD49a-CD49b+) in the CD3- and CD3- NKp46+ cell populations in the spleens of



368 chronically infected mice. As shown in figure 5C, NK cells (CD49b+CD49a-) comprised  
369 22% of the CD3- population of cells and 60% of the lineage negative NKp46+ population  
370 of cells. ILC1 were present at a very low level. Therefore in the spleen, NK cells appear  
371 to be the dominant population of ILC present and they are enriched for a specific receptor  
372 phenotype, which is Lin – CD49b+ CD49a-NKp46+ CD94+ NKG2A+KLRG1+.

373

#### 374 *NK cell function during chronic T. gondii infection*

375 NK cells are the cytotoxic cells of the ILC lineage[51; 52]. NK cells are  
376 also capable of producing high levels of IFN $\gamma$  upon activation. ILC1 are not cytotoxic  
377 and produce high levels of IFN $\gamma$  upon activation. During acute *T. gondii* infection NK  
378 cells and ILC1 are known to produce IFN $\gamma$  in an IL-12 dependent manner[16; 18; 19; 53;  
379 54] We have recently demonstrated that after vaccination, NK cells respond a second  
380 time to help control challenge infection by producing IFN $\gamma$  in an IL-12 and IL-23  
381 dependent manner [55]. We observe that NK cells during chronic *T. gondii* infection  
382 modify their role in immunity to the parasite and are not protective, but detrimental.  
383 They also express an altered receptor repertoire that suggests enrichment for a specific  
384 cell phenotype. Therefore to begin to investigate how NK cells are negative regulators of  
385 CD8+ T cells during chronic *T. gondii* infection we first assayed their function. Mice  
386 were infected as above and starting at week 5 post infection we assessed NK cell (CD3-  
387 CD49b+ NKp46+) function (IFN $\gamma$  X CD107a) by flow cytometry. As shown in figure  
388 6A, after *ex vivo* stimulation, naïve NK cells were capable of producing both IFN $\gamma$  and  
389 expressing the surrogate cytotoxicity marker CD107a. However, after week 5 of  
390 infection (Figure 6a), NK cells produced very little IFN $\gamma$  while significantly increasing

391 their CD107a expression. This pattern of function was observed also at week 7 post  
392 infection. Increases in CD107a+ NK cells were observed in both frequency and absolute  
393 number. Interestingly, the frequency of IFN $\gamma$ + NK cells continued to decrease from  
394 week 5 to week 7 post infection. The data shown in figure 6A was generated *ex vivo* by  
395 using plate bound anti-NK1.1 crosslinking. We repeated *ex vivo* analysis using  
396 PMA/Ionomycin and still the NK cells did not produce IFN $\gamma$  (data not shown).  
397 Interestingly, if these cells were ILC1, we would have expected them to produce IFN $\gamma$ .  
398 We next measured whether the NK cells expressed PD-L1, the ligand for PD1. As shown  
399 in Figure 6B, splenic NK cells did not appear to increase their expression of PD-L1 as  
400 PD-L1 MFI was not significantly different between week 5 and 7 post infection. During  
401 acute systemic *T. gondii* infections, NK cells have been shown to produce IL-10[34].  
402 Therefore, we obtained IL-10GFP TIGER reporter mice and infected them with 10 cysts  
403 of ME49 i.g. Comparing naïve to week 5 post infected mice (Figure 6C), we did not  
404 observe any IL-10 production by NK cells. A recent study demonstrated that NKp46+  
405 ILC could contribute to the development of neurodegenerative disease by being in the  
406 CNS and promoting Th17 responses[47]. We next determined whether there were NK  
407 cells in the CNS. Mice were infected as previously described and at week 5 post  
408 infection, mice were perfused, brains dissected and immune cells isolated. Cells were  
409 analyzed for CD3-NKp46+ populations. As shown in figure 6D, we did not observe an  
410 increase in frequency of CD3- Nkp46+ NK cells in the CNS of *T. gondii* chronically  
411 infected mice at week 5 post infection. Our investigation of the function of the NK cells  
412 acting as negative regulators of immunity during chronic *T. gondii* infection suggests that  
413 NK cells have reduced IFN $\gamma$  production, but may increase cytotoxicity. They do not

414 produce IL-10 and they are functioning from outside the CNS to cause CD8+ T cell  
415 dysfunction.

416 *NKp46 and NKG2A NK cells during chronic T. gondii infection*

417 The NK cell phenotype we observed Lin – CD49b+ CD49a-NKp46+ CD94+  
418 NKG2A+KLRG1+ suggest that NKp46 and NKG2A may contribute NK cell negative  
419 regulation of the immune response to *T. gondii* in chronically infected mice. This is  
420 based on the concept of NK cell licensing[56]. NK cell licensing determines the  
421 responsiveness of NK cells to self versus non-self. A licensed NK cell expresses both  
422 activating and inhibitory receptors on its surface and as a result is tuned or permitted to  
423 respond when self is absent. An absence or reduction in self, usually reduced MHC  
424 expression can be detected on a target cell. At the same time, increases in non-self  
425 detected by elevated ligands binding to the activating receptor activate the NK cell.  
426 NKp46 is an activating receptor expressed on NK cells, ILC1 and some ILC3[52; 57].  
427 The ligand NKp46 recognizes is not very well described. Potential ligands for NKp46  
428 vary in source and structure and to date may include Influenza virus HA, Sigma 1 protein  
429 of Reovirus and *Candida glabrata* proteins Epa 1, 6 and 7[58; 59; 60]. NKp46 is a  
430 natural cytotoxicity receptor, also called NCR1 and is known once it engages its ligand  
431 (NCR1-ligand) to lyse target cells[35]. NKp46 can also promote the expansion and  
432 survival of NK cells similar to other activating receptors[35; 61]. NKG2A is an  
433 inhibitory receptor that recognizes non-classical MHC Class I known as Qa-1b[62; 63].  
434 NKG2A prevents NK cell activation. Based on the licensing paradigm and our data we  
435 hypothesized that during chronic *T. gondii* infection, there was an increase in non-self  
436 (NCR1-ligand) while there was a decrease in self (Qa-1b) which in turn caused NK cells

437 to negatively regulate CD8+ T cells resulting in parasite reactivation and death. To test  
438 this hypothesis spleens from chronically infected mice at week 5 and 7 post infection  
439 were isolated and the expression levels of NKp46-ligand and Qa-1b were measured on  
440 total splenocytes and CD8+ T cells and compared to naïve animals. NCR1-ligand was  
441 detected using soluble murine NCR1 (NKp46) fused to human Fc and Qa-1b using anti-  
442 Qa-1b antibody. In naïve mice total splenocytes were positive for Qa-1b and largely  
443 negative for ligands that were bound by NCR1 (Figure 7A, top and bottom panels,  
444 respectively). At week 5 post infection Qa-1b was significantly increased in expression  
445 and NCR1-ligand remained low compared to naïve mice. At week 7 post infection Qa-1b  
446 expression was decreased significantly compared to week 5 and naïve animals while  
447 NCR1-ligand was increased significantly (Figure 7A). As shown in figure 7B, this  
448 pattern of Qa-1b and NCR1-ligand expression was similar when CD8+ T cells were gated  
449 and assessed. However, the changes in Qa-1b and NCR1-ligand did not appear to be  
450 greater on CD8+ T cells than total splenocytes. We performed preliminary assessments  
451 of whether the NK cells were actually more cytotoxic, but did not find any significant  
452 increase (data not shown), suggesting these interactions were promoting NK cell survival  
453 and maturation as measure by KLRG1 expression on the NK cells (Figure 5A). Overall  
454 the decrease in self (Qa-1b) and the increase in non-self (NCR1-ligand) support the  
455 concept that NK cell licensing was contributing to CD8+ T cell dysfunction in some way.  
456 Therefore to test that these NK cells via a licensing process were contributing to immune  
457 dysfunction during chronic *T. gondii* infection, we infected animals as before and starting  
458 at week 5 post infection we treated or not mice with non-depleting anti-NKp46 blocking  
459 antibody[35]. This approach would not deplete NK cells, but simply block the

460 interaction between NKp46 and the unknown ligand thus potentially decrease NK cell  
461 negative regulation of CD8+ T cells. As shown in figure 7C, anti-NKp46 significantly  
462 prolonged the life of mice with chronic *T. gondii* infection compared to no treatment  
463 controls. These results suggest that modifications of self versus non-self and NK cell  
464 recognition of these modifications via NKp46 and NKG2A receptors potentiate NK cell  
465 dependent negative regulation of CD8+ T cells responses during chronic *T. gondii*  
466 infection. NK cells as a result contribute to immune exhaustion not early during  
467 infection, but later after chronic *T. gondii* infection is established.

468

## 469 **Discussion**

470 The immune mechanisms regulating CD8+ T cell exhaustion resulting in  
471 reactivation of chronic *T. gondii* infections are poorly understood. In this study we  
472 sought to further explore these mechanisms and proposed that NK cells could contribute  
473 to this process. NK cells are innate immune cells and belong to a growing family of  
474 immune cells known as innate lymphoid cells[52; 64]. NK cells provide a first of defense  
475 against many pathogens via their ability to lyse tumor cells and infected cells and produce  
476 high levels of IFN $\gamma$ . Although they have a primary role in innate immune protection,  
477 they can also contribute to long-term immunity. NK cells participate in memory  
478 responses by further differentiating and developing long life and more efficient recall  
479 responses[20; 21; 22]. During acute viral infections, systemic infections and in the tumor  
480 microenvironment NK cells can dysregulate CD4+ and CD8+ T cell responses promoting  
481 pathogen and tumor persistence and immune exhaustion [28; 29; 30; 32; 33; 34; 37; 38;  
482 46]. In addition NK cells can become exhausted themselves in different tumors models

483 and infection[26]. Based on this published knowledge of the complexity of NK cell  
484 biology, we tested whether NK cells become exhausted during chronic *T. gondii*  
485 infection, how they impact long term immunity to the chronic stage of infection and the  
486 mechanisms involved. Our studies demonstrate that NK cells do not appear to become  
487 exhausted because their numbers are stable and they do not increase PD1 or LAG3  
488 expression despite losing the ability to produce IFN $\gamma$ . They appear to enhance parasite  
489 reactivation and erode secondary immune responses in chronically infected animals.  
490 They accomplish this by reducing CD8+ T cell function by increasing their apoptosis.  
491 NK cells have increased activation as indicated by high KLRG1 and CD107a expression.  
492 During chronic *T. gondii* infection NK cells develop a unique Lin-CD49b+CD49a-Ly49-  
493 NKp46+CD94+NKG2A+ phenotype suggesting that these cells receive signals from  
494 altered self through NKp46 recognition of specific ligands and a reduction in Qa-1b.  
495 Indeed staining of total spleen and CD8+ T cells with soluble NCR1 and anti-Qa-1b  
496 indicate there is a significant change in altered self during chronic *T. gondii* infection.  
497 Our studies further support this hypothesis when we block NKp46 interaction and rescue  
498 chronically infected mice from death caused by CD8+ T cell exhaustion and parasite  
499 reactivation similarly to depletion of NK cells. Overall we find that NK cells are  
500 essential for acute immune protection by helping to control the parasite with IFN $\gamma$  and  
501 also by helping to prime CD8+ T cells. However, during chronic *T. gondii* infection NK  
502 cells develop a response that contributes to CD8+ T cell dysfunction thereby promoting  
503 parasite reactivation in mice.

504 NK cells can develop immune exhaustion in the tumor microenvironment, after  
505 overstimulation and during HCV infection[24; 25; 26; 27]. Our results suggest that NK

506 cells are not becoming exhausted, but are developing into cells that negatively regulate  
507 the CD8<sup>+</sup> T cell responses during chronic *T. gondii* infection. CD8<sup>+</sup> T cells are known  
508 to develop immune exhaustion during chronic *T. gondii* infection[10; 12]. This leads to  
509 the reactivation of encysted parasites in the CNS and ultimately results in death of B6  
510 mice. CD8<sup>+</sup> T cell exhaustion during chronic *T. gondii* infection is marked by reduced  
511 CD8<sup>+</sup> T cell numbers, decreased frequencies and numbers of IFN $\gamma$ +CD8<sup>+</sup> T cells in the  
512 spleen and brain, increased CD8<sup>+</sup> T cell apoptosis and high expression of PD1 on the  
513 surface of CD8<sup>+</sup> T cells. These are hallmarks of CD8<sup>+</sup> T cell exhaustion in several  
514 infection and disease models[14]. Our results demonstrate that NK cells are present in the  
515 spleen during chronic *T. gondii* infection, they do not have reduced numbers and do not  
516 express high levels of PD1 or LAG3 as compared to CD4<sup>+</sup> and CD8<sup>+</sup> T cells. When we  
517 investigated NK cell function (IFN $\gamma$  and CD107a), we observed that although NK cells in  
518 chronic *T. gondii* infection lose the ability to produce IFN $\gamma$ , they increase their CD107a  
519 expression indicating a gain of function. Moreover, NK cell depletion rescued mice from  
520 death by helping restore CD8<sup>+</sup> T cell function in spleen and brain, helped maintain  
521 encystation of the parasite and enhanced the survival of chronically infected mice after  
522 secondary parasite challenge. Although, NK cells may lose the ability to produce IFN $\gamma$ ,  
523 our results suggest that unlike tumor, overstimulation and persistent HCV infection[24;  
524 25; 26; 27], they are also gaining function that negatively regulates the adaptive response  
525 to chronic *T. gondii* infection. The mechanism by which they are causing this negative  
526 regulation is unclear and will be important in future studies.

527 NK cells in the steady state express a stochastic array of activating and inhibitory  
528 receptors that help regulate their function[65; 66; 67]. In mice this includes the Ly49

529 family of receptors (D-I), natural cytotoxicity receptors (NCRs), NKG2D, 2B4 and  
530 CD94/NKG2A. In the naïve state in B6 mice, these receptors are expressed on most NK  
531 cells in different combinations, but at relatively high frequencies. Our data demonstrates  
532 that NK cells during chronic *T. gondii* infection have altered expression of NK cell  
533 receptors. We observe a near complete loss of Ly49 D, H and I. At the same time we  
534 observed the maintenance of CD49b+ NKp46+ NK1.1+ cells. Within this population the  
535 frequency of CD94+NKG2A+ cells increased dramatically and this increase was only  
536 observed during persistent chronic *T. gondii* infection and not after infection with the  
537 non-persistent vaccine strain. These cells appear to have a licensed NK cell phenotype  
538 because of the presence of both activating and inhibitory receptors on their surface[56].  
539 Thus the licensing paradigm could explain why this phenotype of NK cells develops  
540 during chronic *T. gondii* infection. In this situation, the chronic infection environment in  
541 Toxoplasmosis causes the activating receptor NKp46 to recognize a ligand expressed on  
542 target cells that potentiates the activation, survival and increased abundance of NKp46+  
543 CD94+NKG2A+ NK cells. This is what occurs with other activating receptors including  
544 Ly49H after it recognizes m157 from MCMV[22; 48]. As a result of Ly49H and m157  
545 interaction, Ly49H+ NK cells are more abundant, have longer life and can respond more  
546 efficiently to secondary infection. While Ly49H interaction with MCMV m157 could  
547 directly activate all Ly49H positive NK cells regardless of inhibitory receptor expression,  
548 our data suggests that because of the higher frequency of CD94+NKG2A+ NK cells  
549 within the NKp46+ population, that loss of the inhibitory signal through NKG2A also  
550 helps promote the development of this NK cell population. NKG2A recognizes the non-  
551 classical MHC protein Qa-1b[63]. We observe that Qa-1b is decreased in expression by



552 week 7 post parasite infection. This could take the brakes off of the NK cells and upon  
553 interaction of NKp46 with NCR1-ligand results in the enrichment of this phenotype of  
554 NK cells and their activation during chronic *T. gondii* infection. What NKp46 could be  
555 recognizing is still a mystery during chronic *T. gondii* infection. The ligands for NKp46  
556 vary in source and structure and to date may include Influenza virus HA, Sigma 1 protein  
557 of Reovirus and *Candida glabrata* proteins Epa 1, 6 and 7[58; 59; 60]. Our data indicate  
558 that there is increased staining of spleen cells and CD8+ T cells with soluble NCR1.  
559 What protein modifications are occurring or genes that are being expressed to produce  
560 this ligand are unclear, however, the increase in binding of soluble NKp46 supports the  
561 hypothesis that the NKp46 signal is required for the development of this unique NK cell  
562 population during chronic *T. gondii* infection.

563         Another important phenotype we observe is the increase in KLRG1+ NK cells in  
564 chronically infected mice. KLRG1 is an inhibitory receptor expressed more highly as  
565 NK cells mature[15; 68]. NK cell maturation is activating receptor dependent. Recent  
566 studies investigating exhausted NK cells during chronic stimulation suggest that  
567 increased KLRG1 indicates NK cell exhaustion [25]. In this study, NKG2D interaction  
568 with high levels of NKG2D ligands results in increased KLRG1 expression and loss of  
569 NKG2D expression on the cells and NK cell exhaustion. Therefore another possible  
570 explanation of the development the phenotype of NK cells during chronic *T. gondii*  
571 infection could be that ligands for other receptors are highly upregulated during chronic  
572 *T. gondii* infection. This could then explain why we observe a loss of expression of Ly49  
573 D, Ly49H, and Ly49I+ NK cells. However, we performed an exhaustive analysis of  
574 known murine NK cell receptor ligands and we did not detect any increase in their

575 expression during chronic *T. gondii* infection (data not shown). We only observed  
576 increases in NKp46-ligand and reduced Qa-1b expression. Moreover, blockade of  
577 NKp46 with a non-depleting anti-NKp46 antibody rescued mice to a similar level from  
578 death compared to NK cell depletion with anti-NK1.1. A recent study demonstrates that  
579 NK cells are plastic during *T. gondii* infection and differentiate into ILC1 in the liver  
580 [50]. We did not look in the liver for an increase in ILC1, but we did look in the spleen  
581 and did not see an increase in CD49a+ ILC1 within the NKp46+ population. We propose  
582 that for splenic NK cells and not ILC1 during chronic *T. gondii* infection NKp46  
583 interaction with its ligand and loss of Qa-1b interaction with NKG2A promotes the  
584 development of NK cells as negative regulators of CD8+ T cell immunity during chronic  
585 *T. gondii* infection.

586 Our data demonstrates that NK cells present during chronic *T. gondii* infection  
587 alter their role in immunity and act as negative regulators of CD8+ T cells to promote  
588 reactivation of the parasite. NK cells are the cytotoxic ILC[57]. They also produce high  
589 levels of IFN $\gamma$  and other cytokines after activation. NK cells are usually considered to be  
590 a first line of defense against many pathogens and tumors. However, many recent reports  
591 demonstrate that NK cells can also negatively regulate adaptive immune responses  
592 through several different mechanisms[28; 29; 30; 32; 33; 34; 37; 38; 39; 46; 47; 69].  
593 These include the production of the immunosuppressive cytokine IL-10. NK cells are  
594 activated to produce IL-10 during acute stage systemic infections including *T. gondii*.  
595 NK cells can also induce apoptosis or kill CD4+ and/or CD8+ T cells during acute  
596 infections through TRAIL-TRAILR interactions, NKp46 dependent cytotoxicity and  
597 cytotoxicity through undefined receptor ligand pairs. NK cells can also kill tumor

598 infiltrating lymphocytes (TILs) via an NKp46 dependent process. Another study recently  
599 published suggests that NK cells that become exhausted during persistent HCV infection  
600 lose their ability to produce IFN $\gamma$  and as a result the CD8 $^+$  T cell effector population is  
601 unable to be maintained[24]. These studies suggest that NK cells can secrete immune  
602 suppressive cytokines to act systemically to suppress immunity, can act directly against T  
603 cells and kill them or because they are exhausted themselves they are unable to help  
604 maintain CD8 $^+$  T cell functions. During chronic *T. gondii* infection we observe that NK  
605 cells lose their ability to produce IFN $\gamma$  while increasing the CD107a expression. Thus  
606 while NK cells might lose one function during chronic *T. gondii* infection they appear to  
607 have a gain of function. We did attempt to measure whether NK cells from chronically  
608 infected mice were more cytotoxic, but we did not observe any increase (data not shown).  
609 Importantly CD107a is only a surrogate marker for NK cell cytotoxicity[70]. CD107a can  
610 associate with other secretory vesicles and in particular can be surface expressed  
611 alongside MHC Class II on DCs[70; 71]. Therefore, we believe that the increase in  
612 CD107a on NK cells during chronic *T. gondii* infection may indicate a different type of  
613 immune suppressive function. What that suppressive function might be is still unclear.  
614 We did not observe NK cells producing IL-10 during the chronic stage of parasite  
615 infection and they also did not increase their expression of PDL1, the ligand for PD1.  
616 PDL1 expression can promote exhaustion of CD8 $^+$  T cells during chronic *T. gondii*  
617 infection[10]. Therefore based on our results we propose that NK cells are acquiring a  
618 different type of immune suppression than producing IL-10 or being cytotoxic. Another  
619 possibility is that sustained NK cell IFN $\gamma$  is required to help maintain CD8 $^+$  T cell  
620 function during chronic *T. gondii* infection. NK cells are thought during acute *T. gondii*

621 to help prime CD8<sup>+</sup> T cell responses, especially in the absence of CD4<sup>+</sup> T cell help[40].  
622 We confirmed the importance of NK cells for priming CD8<sup>+</sup> T cells in this study. Based  
623 on these studies and our data along with data from the persistent HCV infection study, a  
624 lack of NK cell IFN $\gamma$  could also not support CD8<sup>+</sup> T cell function. However, our data  
625 show that NK cell depletion enhances CD8<sup>+</sup> T cell function during chronic *T. gondii*  
626 infection making this less likely and that the negative regulation of CD8<sup>+</sup> T cell  
627 responses by NK cells is via a different mechanism.

628 In this study we present data suggesting that during chronic *T. gondii* infection,  
629 NK cells are still present, do not appear exhausted based on cell number and PD1 or  
630 LAG3 expression. They negatively impact the mortality of chronically infected mice and  
631 NK cell depletion rescues animals from CD8<sup>+</sup> T cell exhaustion (CD8<sup>+</sup> T cell function is  
632 maintained and apoptosis reduced) and parasite reactivation. The NK cells develop a  
633 unique phenotype and are enriched for cells that are CD49b<sup>+</sup> NKp46<sup>+</sup> CD94<sup>+</sup> NKG2A<sup>+</sup>  
634 KLRG1<sup>+</sup>. The development of this population could be dependent upon activating  
635 receptor NKp46 recognition of a specific ligand while NKG2A interaction with Qa-1b is  
636 reduced. NK cells suppress the CD8<sup>+</sup> T cell response by an as of yet identified  
637 mechanism that may be independent of cytotoxicity, IL-10 production or the expression  
638 of PDL1. Overall in chronic *T. gondii* infection, NK cells may contribute to CD8<sup>+</sup> T cell  
639 exhaustion and persistence of the parasite and manipulating them to prevent the  
640 development of this response could improve health outcomes for individuals susceptible  
641 to parasite reactivation.

642

643 **Acknowledgements**

644 We would like to acknowledge Corwin Guraedy for animal care and maintenance.

645

646 **Author contributions**

647 Ryan Krempels and Jason P. Gigley developed the scientific concept. Ryan Krempels,  
648 Daria L. Ivanova, Stephen L. Denton, Kevin D. Fettel, Giandor M. Saltz, David M. Rach,  
649 Rida Fatima, Tiffany Mundenke, Joshua Materi and Jason P. Gigley carried out  
650 experiments, acquired and analyzed data and helped generate figures for the manuscript.  
651 Jason P. Gigley wrote the manuscript. Ildiko R. Dunay consulted on the manuscript.

652 **Conflicts of interest**

653 There are no conflicts of interest.

654 **Contributions to the field (200 words).**

655 This study investigated a novel mechanism involved in the development of immune  
656 exhaustion during chronic *T. gondii* infection. There are still many unanswered questions  
657 about why *T. gondii* is able to persist for life in a host. There are also many open  
658 questions about how chronic disease situations cause NK cells to develop responses that  
659 can inhibit immunity. Our results demonstrate that in a chronic protozoan infection, NK  
660 cells contribute to parasite persistence by enhancing immune exhaustion. The findings  
661 also indicate that the chronic inflammatory state of long term *T. gondii* infection modifies  
662 the NK cell compartment and that only persistent *T. gondii* infection induces this type of  
663 response. This study will help in understanding how to combat life long infection with *T.*  
664 *gondii* to improve therapies for those individuals at high risk for this infection.

665 **Funding**

666 This work is supported by grants from the American Heart Association AHA  
667 17GRNT33700199 and University of Wyoming INBRE P20 GM103432 DRPP awarded  
668 to JPG. The University of Wyoming INBRE P20 GM103432 Graduate Assistantship  
669 supported D.L.I and S.L.D. T.M.M. is a University of Wyoming INBRE P20 GM103432  
670 supported undergraduate fellow. This project is supported in part by a grant from the  
671 National Institute of General Medical Sciences (2P20GM103432) from the National  
672 Institutes of Health. The content is solely the responsibility of the authors and does not  
673 necessarily represent the official views of the National Institutes of Health

674

## 675 **References**

- 676 [1] P.S. Mead, L. Slutsker, V. Dietz, L.F. McCaig, J.S. Bresee, C. Shapiro, P.M. Griffin,  
677 and R.V. Tauxe, Food-related illness and death in the United States. *Emerg Infect*  
678 *Dis* 5 (1999) 607-25.
- 679 [2] J.P. Gigley, The Diverse Role of NK Cells in Immunity to *Toxoplasma gondii*  
680 *Infection*. *PLoS Pathog* 12 (2016) e1005396.
- 681 [3] G. Harms Pritchard, A.O. Hall, D.A. Christian, S. Wagage, Q. Fang, G. Muallem, B.  
682 John, A. Glatman Zaretsky, W.G. Dunn, J. Perrigoue, S.L. Reiner, and C.A.  
683 Hunter, Diverse roles for T-bet in the effector responses required for resistance to  
684 infection. *J Immunol* 194 (2015) 1131-40.
- 685 [4] I. Coppens, Exploitation of auxotrophies and metabolic defects in *Toxoplasma* as  
686 therapeutic approaches. *Int J Parasitol* 44 (2014) 109-20.

- 687 [5] J.B. Radke, J.N. Burrows, D.E. Goldberg, and L.D. Sibley, Evaluation of Current and  
688 Emerging Antimalarial Medicines for Inhibition of *Toxoplasma gondii* Growth in  
689 Vitro. *ACS Infect Dis* 4 (2018) 1264-1274.
- 690 [6] Y. Suzuki, M.A. Orellana, R.D. Schreiber, and J.S. Remington, Interferon-gamma:  
691 the major mediator of resistance against *Toxoplasma gondii*. *Science* 240 (1988)  
692 516-8.
- 693 [7] Y. Suzuki, and J.S. Remington, Dual regulation of resistance against *Toxoplasma*  
694 *gondii* infection by Lyt-2+ and Lyt-1+, L3T4+ T cells in mice. *J Immunol* 140  
695 (1988) 3943-6.
- 696 [8] R.T. Gazzinelli, S. Hayashi, M. Wysocka, L. Carrera, R. Kuhn, W. Muller, F.  
697 Roberge, G. Trinchieri, and A. Sher, Role of IL-12 in the initiation of cell  
698 mediated immunity by *Toxoplasma gondii* and its regulation by IL-10 and nitric  
699 oxide. *J Eukaryot Microbiol* 41 (1994) 9S.
- 700 [9] R.T. Gazzinelli, M. Wysocka, S. Hayashi, E.Y. Denkers, S. Hieny, P. Caspar, G.  
701 Trinchieri, and A. Sher, Parasite-induced IL-12 stimulates early IFN-gamma  
702 synthesis and resistance during acute infection with *Toxoplasma gondii*. *J*  
703 *Immunol* 153 (1994) 2533-43.
- 704 [10] R. Bhadra, J.P. Gigley, L.M. Weiss, and I.A. Khan, Control of *Toxoplasma*  
705 reactivation by rescue of dysfunctional CD8+ T-cell response via PD-1-PDL-1  
706 blockade. *Proc Natl Acad Sci U S A* 108 (2011) 9196-201.
- 707 [11] R. Bhadra, J.P. Gigley, and I.A. Khan, Cutting edge: CD40-CD40 ligand pathway  
708 plays a critical CD8-intrinsic and -extrinsic role during rescue of exhausted CD8  
709 T cells. *J Immunol* 187 (2011) 4421-5.

- 710 [12] R. Bhadra, J.P. Gigley, and I.A. Khan, PD-1-mediated attrition of polyfunctional  
711 memory CD8<sup>+</sup> T cells in chronic toxoplasma infection. *J Infect Dis* 206 (2012)  
712 125-34.
- 713 [13] S. Hwang, D.A. Cobb, R. Bhadra, B. Youngblood, and I.A. Khan, Blimp-1-mediated  
714 CD4 T cell exhaustion causes CD8 T cell dysfunction during chronic  
715 toxoplasmosis. *J Exp Med* (2016).
- 716 [14] E.J. Wherry, and M. Kurachi, Molecular and cellular insights into T cell exhaustion.  
717 *Nat Rev Immunol* 15 (2015) 486-99.
- 718 [15] T.L. Geiger, and J.C. Sun, Development and maturation of natural killer cells. *Curr*  
719 *Opin Immunol* 39 (2016) 82-9.
- 720 [16] E.Y. Denkers, R.T. Gazzinelli, D. Martin, and A. Sher, Emergence of NK1.1<sup>+</sup> cells  
721 as effectors of IFN-gamma dependent immunity to *Toxoplasma gondii* in MHC  
722 class I-deficient mice. *J Exp Med* 178 (1993) 1465-72.
- 723 [17] L.L. Johnson, F.P. VanderVegt, and E.A. Havell, Gamma interferon-dependent  
724 temporary resistance to acute *Toxoplasma gondii* infection independent of CD4<sup>+</sup>  
725 or CD8<sup>+</sup> lymphocytes. *Infect Immun* 61 (1993) 5174-80.
- 726 [18] R.T. Gazzinelli, S. Hieny, T.A. Wynn, S. Wolf, and A. Sher, Interleukin 12 is  
727 required for the T-lymphocyte-independent induction of interferon gamma by an  
728 intracellular parasite and induces resistance in T-cell-deficient hosts. *Proc Natl*  
729 *Acad Sci U S A* 90 (1993) 6115-9.
- 730 [19] C.A. Hunter, C.S. Subauste, V.H. Van Cleave, and J.S. Remington, Production of  
731 gamma interferon by natural killer cells from *Toxoplasma gondii*-infected SCID



- 732 mice: regulation by interleukin-10, interleukin-12, and tumor necrosis factor  
733 alpha. *Infect Immun* 62 (1994) 2818-24.
- 734 [20] J.G. O'Leary, M. Goodarzi, D.L. Drayton, and U.H. von Andrian, T cell- and B cell-  
735 independent adaptive immunity mediated by natural killer cells. *Nat Immunol* 7  
736 (2006) 507-16.
- 737 [21] M.A. Cooper, J.M. Elliott, P.A. Keyel, L. Yang, J.A. Carrero, and W.M. Yokoyama,  
738 Cytokine-induced memory-like natural killer cells. *Proc Natl Acad Sci U S A* 106  
739 (2009) 1915-9.
- 740 [22] J.C. Sun, J.N. Beilke, and L.L. Lanier, Adaptive immune features of natural killer  
741 cells. *Nature* 457 (2009) 557-61.
- 742 [23] S. Paust, H.S. Gill, B.Z. Wang, M.P. Flynn, E.A. Moseman, B. Senman, M.  
743 Szczepanik, A. Telenti, P.W. Askenase, R.W. Compans, and U.H. von Andrian,  
744 Critical role for the chemokine receptor CXCR6 in NK cell-mediated antigen-  
745 specific memory of haptens and viruses. *Nat Immunol* 11 (2010) 1127-35.
- 746 [24] C. Zhang, X.M. Wang, S.R. Li, T. Twelkmeyer, W.H. Wang, S.Y. Zhang, S.F.  
747 Wang, J.Z. Chen, X. Jin, Y.Z. Wu, X.W. Chen, S.D. Wang, J.Q. Niu, H.R. Chen,  
748 and H. Tang, NKG2A is a NK cell exhaustion checkpoint for HCV persistence.  
749 *Nat Commun* 10 (2019) 1507.
- 750 [25] M. Alvarez, F. Simonetta, J. Baker, A. Pierini, A.S. Wenokur, A.R. Morrison, W.J.  
751 Murphy, and R.S. Negrin, Regulation of murine NK cell exhaustion through the  
752 activation of the DNA damage repair pathway. *JCI Insight* 5 (2019).

- 753 [26] C. Sun, H.Y. Sun, W.H. Xiao, C. Zhang, and Z.G. Tian, Natural killer cell  
754 dysfunction in hepatocellular carcinoma and NK cell-based immunotherapy. *Acta*  
755 *Pharmacol Sin* 36 (2015) 1191-9.
- 756 [27] S. Gill, A.E. Vasey, A. De Souza, J. Baker, A.T. Smith, H.E. Kohrt, M. Florek, K.D.  
757 Gibbs, Jr., K. Tate, D.S. Ritchie, and R.S. Negrin, Rapid development of  
758 exhaustion and down-regulation of eomesodermin limit the antitumor activity of  
759 adoptively transferred murine natural killer cells. *Blood* 119 (2012) 5758-68.
- 760 [28] S.N. Waggoner, M. Cornberg, L.K. Selin, and R.M. Welsh, Natural killer cells act as  
761 rheostats modulating antiviral T cells. *Nature* 481 (2012) 394-8.
- 762 [29] P.A. Lang, K.S. Lang, H.C. Xu, M. Grusdat, I.A. Parish, M. Recher, A.R. Elford, S.  
763 Dhanji, N. Shaabani, C.W. Tran, D. Dissanayake, R. Rahbar, M. Ghazarian, A.  
764 Brustle, J. Fine, P. Chen, C.T. Weaver, C. Klose, A. Diefenbach, D. Haussinger,  
765 J.R. Carlyle, S.M. Kaech, T.W. Mak, and P.S. Ohashi, Natural killer cell  
766 activation enhances immune pathology and promotes chronic infection by  
767 limiting CD8<sup>+</sup> T-cell immunity. *Proc Natl Acad Sci U S A* 109 (2012) 1210-5.
- 768 [30] K.D. Cook, and J.K. Whitmire, The depletion of NK cells prevents T cell exhaustion  
769 to efficiently control disseminating virus infection. *J Immunol* 190 (2013) 641-9.
- 770 [31] D. Peppas, U.S. Gill, G. Reynolds, N.J. Easom, L.J. Pallett, A. Schurich, L. Micco, G.  
771 Nebbia, H.D. Singh, D.H. Adams, P.T. Kennedy, and M.K. Maini, Up-regulation  
772 of a death receptor renders antiviral T cells susceptible to NK cell-mediated  
773 deletion. *J Exp Med* 210 (2013) 99-114.
- 774 [32] J. Crouse, G. Bedenikovic, M. Wiesel, M. Ibberson, I. Xenarios, D. Von Laer, U.  
775 Kalinke, E. Vivier, S. Jonjic, and A. Oxenius, Type I interferons protect T cells

- 776            against NK cell attack mediated by the activating receptor NCR1. *Immunity* 40  
777            (2014) 961-73.
- 778 [33] I.S. Schuster, M.E. Wikstrom, G. Brizard, J.D. Coudert, M.J. Estcourt, M. Manzur,  
779            L.A. O'Reilly, M.J. Smyth, J.A. Trapani, G.R. Hill, C.E. Andoniou, and M.A.  
780            Degli-Esposti, TRAIL+ NK cells control CD4+ T cell responses during chronic  
781            viral infection to limit autoimmunity. *Immunity* 41 (2014) 646-56.
- 782 [34] G. Perona-Wright, K. Mohrs, F.M. Szaba, L.W. Kummer, R. Madan, C.L. Karp,  
783            L.L. Johnson, S.T. Smiley, and M. Mohrs, Systemic but not local infections elicit  
784            immunosuppressive IL-10 production by natural killer cells. *Cell Host Microbe* 6  
785            (2009) 503-12.
- 786 [35] E. Narni-Mancinelli, B.N. Jaeger, C. Bernat, A. Fenis, S. Kung, A. De Gassart, S.  
787            Mahmood, M. Gut, S.C. Heath, J. Estelle, E. Bertosio, F. Vely, L.N. Gastinel, B.  
788            Beutler, B. Malissen, M. Malissen, I.G. Gut, E. Vivier, and S. Ugolini, Tuning of  
789            natural killer cell reactivity by NKp46 and Helios calibrates T cell responses.  
790            *Science* 335 (2012) 344-8.
- 791 [36] D.W. Donley, A.R. Olson, M.F. Raisbeck, J.H. Fox, and J.P. Gigley, Huntingtons  
792            Disease Mice Infected with *Toxoplasma gondii* Demonstrate Early Kynurenine  
793            Pathway Activation, Altered CD8+ T-Cell Responses, and Premature Mortality.  
794            *PLoS One* 11 (2016) e0162404.
- 795 [37] S.N. Waggoner, K.A. Daniels, and R.M. Welsh, Therapeutic depletion of natural  
796            killer cells controls persistent infection. *J Virol* 88 (2014) 1953-60.

- 797 [38] K.D. Cook, H.C. Kline, and J.K. Whitmire, NK cells inhibit humoral immunity by  
798 reducing the abundance of CD4+ T follicular helper cells during a chronic virus  
799 infection. *J Leukoc Biol* 98 (2015) 153-62.
- 800 [39] C. Rydyznski, K.A. Daniels, E.P. Karmele, T.R. Brooks, S.E. Mahl, M.T. Moran, C.  
801 Li, R. Sutiwisesak, R.M. Welsh, and S.N. Waggoner, Generation of cellular  
802 immune memory and B-cell immunity is impaired by natural killer cells. *Nat*  
803 *Commun* 6 (2015) 6375.
- 804 [40] C.L. Combe, T.J. Curiel, M.M. Moretto, and I.A. Khan, NK cells help to induce  
805 CD8(+)-T-cell immunity against *Toxoplasma gondii* in the absence of CD4(+) T  
806 cells. *Infect Immun* 73 (2005) 4913-21.
- 807 [41] H. Guan, M. Moretto, D.J. Bzik, J. Gigley, and I.A. Khan, NK cells enhance  
808 dendritic cell response against parasite antigens via NKG2D pathway. *J Immunol*  
809 179 (2007) 590-6.
- 810 [42] R.S. Goldszmid, A. Bafica, D. Jankovic, C.G. Feng, P. Caspar, R. Winkler-Pickett,  
811 G. Trinchieri, and A. Sher, TAP-1 indirectly regulates CD4+ T cell priming in  
812 *Toxoplasma gondii* infection by controlling NK cell IFN-gamma production. *J*  
813 *Exp Med* 204 (2007) 2591-602.
- 814 [43] R.S. Goldszmid, P. Caspar, A. Rivollier, S. White, A. Dzutsev, S. Hieny, B. Kelsall,  
815 G. Trinchieri, and A. Sher, NK cell-derived interferon-gamma orchestrates  
816 cellular dynamics and the differentiation of monocytes into dendritic cells at the  
817 site of infection. *Immunity* 36 (2012) 1047-59.
- 818 [44] D.L. Ivanova, Anti-Asialo GM1 treatment during secondary *Toxoplasma gondii*  
819 infection is lethal and depletes T cells. *BioRxiv* bioRxiv 550608; doi: (2019).

- 820 [45] H.C. Xu, M. Grusdat, A.A. Pandyra, R. Polz, J. Huang, P. Sharma, R. Deenen, K.  
821 Kohrer, R. Rahbar, A. Diefenbach, K. Gibbert, M. Lohning, L. Hocker, Z.  
822 Waibler, D. Haussinger, T.W. Mak, P.S. Ohashi, K.S. Lang, and P.A. Lang, Type  
823 I interferon protects antiviral CD8+ T cells from NK cell cytotoxicity. *Immunity*  
824 40 (2014) 949-60.
- 825 [46] S.Q. Crome, L.T. Nguyen, S. Lopez-Verges, S.Y. Yang, B. Martin, J.Y. Yam, D.J.  
826 Johnson, J. Nie, M. Pniak, P.H. Yen, A. Milea, R. Sowamber, S.R. Katz, M.Q.  
827 Bernardini, B.A. Clarke, P.A. Shaw, P.A. Lang, H.K. Berman, T.J. Pugh, L.L.  
828 Lanier, and P.S. Ohashi, A distinct innate lymphoid cell population regulates  
829 tumor-associated T cells. *Nat Med* 23 (2017) 368-375.
- 830 [47] B. Kwong, R. Rua, Y. Gao, J. Flickinger, Jr., Y. Wang, M.J. Kruhlak, J. Zhu, E.  
831 Vivier, D.B. McGavern, and V. Lazarevic, T-bet-dependent NKp46+ innate  
832 lymphoid cells regulate the onset of TH17-induced neuroinflammation. *Nat*  
833 *Immunol* 18 (2017) 1117-1127.
- 834 [48] L.L. Lanier, NK cell recognition. *Annu Rev Immunol* 23 (2005) 225-74.
- 835 [49] D.L. Ivanova, R. Fatima, and J.P. Gigley, Comparative Analysis of Conventional  
836 Natural Killer Cell Responses to Acute Infection with *Toxoplasma gondii* Strains  
837 of Different Virulence. *Front Immunol* 7 (2016) 347.
- 838 [50] E. Park, S. Patel, Q. Wang, P. Andhey, K. Zaitsev, S. Porter, M. Hershey, M. Bern,  
839 B. Plougastel-Douglas, P. Collins, M. Colonna, K.M. Murphy, E. Oltz, M.  
840 Artyomov, L.D. Sibley, and W.M. Yokoyama, *Toxoplasma gondii* infection  
841 drives conversion of NK cells into ILC1-like cells. *Elife* 8 (2019).

- 842 [51] A. Diefenbach, M. Colonna, and S. Koyasu, Development, differentiation, and  
843 diversity of innate lymphoid cells. *Immunity* 41 (2014) 354-365.
- 844 [52] G. Eberl, J.P. Di Santo, and E. Vivier, The brave new world of innate lymphoid  
845 cells. *Nat Immunol* 16 (2015) 1-5.
- 846 [53] C.S.N. Klose, M. Flach, L. Mohle, L. Rogell, T. Hoyler, K. Ebert, C. Fabiunke, D.  
847 Pfeifer, V. Sexl, D. Fonseca-Pereira, R.G. Domingues, H. Veiga-Fernandes, S.J.  
848 Arnold, M. Busslinger, I.R. Dunay, Y. Tanriver, and A. Diefenbach,  
849 Differentiation of type 1 ILCs from a common progenitor to all helper-like innate  
850 lymphoid cell lineages. *Cell* 157 (2014) 340-356.
- 851 [54] C.A. Hunter, R. Chizzonite, and J.S. Remington, IL-1 beta is required for IL-12 to  
852 induce production of IFN-gamma by NK cells. A role for IL-1 beta in the T cell-  
853 independent mechanism of resistance against intracellular pathogens. *J Immunol*  
854 155 (1995) 4347-54.
- 855 [55] D.L. Ivanova, T.M. Mundhenke, and J.P. Gigley, The IL-12- and IL-23-Dependent  
856 NK Cell Response Is Essential for Protective Immunity against Secondary  
857 *Toxoplasma gondii* Infection. *J Immunol* 203 (2019) 2944-2958.
- 858 [56] S. Kim, J. Poursine-Laurent, S.M. Truscott, L. Lybarger, Y.J. Song, L. Yang, A.R.  
859 French, J.B. Sunwoo, S. Lemieux, T.H. Hansen, and W.M. Yokoyama, Licensing  
860 of natural killer cells by host major histocompatibility complex class I molecules.  
861 *Nature* 436 (2005) 709-13.
- 862 [57] V.S. Cortez, and M. Colonna, Diversity and function of group 1 innate lymphoid  
863 cells. *Immunol Lett* 179 (2016) 19-24.

- 864 [58] A. Vitenshtein, Y. Charpak-Amikam, R. Yamin, Y. Bauman, B. Isaacson, N. Stein,  
865 O. Berhani, L. Dassa, M. Gamliel, C. Gur, A. Glasner, C. Gomez, R. Ben-Ami, N.  
866 Osherov, B.P. Cormack, and O. Mandelboim, NK Cell Recognition of *Candida*  
867 *glabrata* through Binding of NKp46 and NCR1 to Fungal Ligands Epa1, Epa6,  
868 and Epa7. *Cell Host Microbe* 20 (2016) 527-534.
- 869 [59] O. Mandelboim, N. Lieberman, M. Lev, L. Paul, T.I. Arnon, Y. Bushkin, D.M.  
870 Davis, J.L. Strominger, J.W. Yewdell, and A. Porgador, Recognition of  
871 haemagglutinins on virus-infected cells by NKp46 activates lysis by human NK  
872 cells. *Nature* 409 (2001) 1055-60.
- 873 [60] Y. Bar-On, Y. Charpak-Amikam, A. Glasner, B. Isaacson, A. Duev-Cohen, P.  
874 Tsukerman, A. Varvak, M. Mandelboim, and O. Mandelboim, NKp46 Recognizes  
875 the Sigma1 Protein of Reovirus: Implications for Reovirus-Based Cancer  
876 Therapy. *J Virol* 91 (2017).
- 877 [61] S.H. Lee, K.S. Kim, N. Fodil-Cornu, S.M. Vidal, and C.A. Biron, Activating  
878 receptors promote NK cell expansion for maintenance, IL-10 production, and  
879 CD8 T cell regulation during viral infection. *J Exp Med* 206 (2009) 2235-51.
- 880 [62] T.A. Holderried, P.A. Lang, H.J. Kim, and H. Cantor, Genetic disruption of CD8+  
881 Treg activity enhances the immune response to viral infection. *Proc Natl Acad Sci*  
882 *U S A* 110 (2013) 21089-94.
- 883 [63] R.E. Vance, J.R. Kraft, J.D. Altman, P.E. Jensen, and D.H. Raulet, Mouse  
884 CD94/NKG2A is a natural killer cell receptor for the nonclassical major  
885 histocompatibility complex (MHC) class I molecule Qa-1(b). *J Exp Med* 188  
886 (1998) 1841-8.

- 887 [64] H. Spits, D. Artis, M. Colonna, A. Diefenbach, J.P. Di Santo, G. Eberl, S. Koyasu,  
888 R.M. Locksley, A.N. McKenzie, R.E. Mebius, F. Powrie, and E. Vivier, Innate  
889 lymphoid cells--a proposal for uniform nomenclature. *Nat Rev Immunol* 13  
890 (2013) 145-9.
- 891 [65] J.C. Sun, Transcriptional Control of NK Cells. *Curr Top Microbiol Immunol* 395  
892 (2016) 1-36.
- 893 [66] P.H. Kruse, J. Matta, S. Ugolini, and E. Vivier, Natural cytotoxicity receptors and  
894 their ligands. *Immunol Cell Biol* 92 (2014) 221-9.
- 895 [67] H.J. Pegram, D.M. Andrews, M.J. Smyth, P.K. Darcy, and M.H. Kershaw,  
896 Activating and inhibitory receptors of natural killer cells. *Immunol Cell Biol* 89  
897 (2011) 216-24.
- 898 [68] M.S. Tessmer, C. Fugere, F. Stevenaert, O.V. Naidenko, H.J. Chong, G. Leclercq,  
899 and L. Brossay, KLRG1 binds cadherins and preferentially associates with SHIP-  
900 1. *Int Immunol* 19 (2007) 391-400.
- 901 [69] J. Crouse, H.C. Xu, P.A. Lang, and A. Oxenius, NK cells regulating T cell  
902 responses: mechanisms and outcome. *Trends Immunol* 36 (2015) 49-58.
- 903 [70] G. Alter, J.M. Malenfant, and M. Altfeld, CD107a as a functional marker for the  
904 identification of natural killer cell activity. *J Immunol Methods* 294 (2004) 15-22.
- 905 [71] X. Michelet, S. Garg, B.J. Wolf, A. Tuli, P. Ricciardi-Castagnoli, and M.B. Brenner,  
906 MHC class II presentation is controlled by the lysosomal small GTPase, Arl8b. *J*  
907 *Immunol* 194 (2015) 2079-88.
- 908
- 909



910 **Figure legends**

911 **Figure 1. NK cells do not exhibit immune exhaustion characteristics during chronic**

912 ***T. gondii* infection.** C57BL/6 mice were orally infected or not with 10 cysts of ME49

913 and 5 and 7 weeks after infection spleen cells were analyzed for (A) NK cell (Lineage-

914 CD49b+) frequency and number. NK cells, CD4+ and CD8+ T cells were then analyzed

915 for (B) PD1 MFI and (C) PD1+ frequency based on separating the populations into PD1

916 low (Lo), intermediate (Int) and high (Hi). NK cells were then assayed for (D) LAG3

917 expression. Raw flow data presented are representative and based on means from 3

918 independent experiments. All graphs are mean  $\pm$  SD. Graphs present pooled data from 2

919 independent experiments. Significance is denoted by \* with a  $p \leq 0.05$ ,  $n=4-5$  mice per

920 group.

921

922

923 **Figure 2. NK cells promote immune exhaustion and parasite reactivation during**

924 **chronic *T. gondii* infection.** C57BL/6 mice were infected orally with 10 cysts of ME49

925 and infection outcome monitored. (A) Survival after 200 ug anti-NK1.1 every 2<sup>nd</sup> day

926 starting at week 5 p.i. (B) Brain cyst burden after anti-NK1.1 treatment starting at week 5

927 p.i. (C) Survival of chronically infected animals after lethal secondary 200 ME49 cyst or

928 1000 tachyzoite RH strain challenge with or without anti-NK1.1. The log-rank (Mantel-

929 Cox) test was used to evaluate survival rates. Ordinary one-way ANOVA was used to

930 evaluate the parasite burdens. All graphs are mean  $\pm$  SD. The data presented in graphs is

931 pooled from 3 independent experiments with an  $n=4-5$  per group. Total number of mice

932 used was 12-15 animals per group. \* denotes significance as  $p \leq 0.05$ .

933

934 **Figure 3. NK cells reduce polyfunctional CD8+ T cells by increasing their apoptosis**

935 **during chronic *T. gondii* infection.** C57BL/6 mice were infected as described and 5

936 weeks after infection treated with anti-NK1.1 i.p. Brain and spleen cells were harvested

937 and restimulated *ex vivo* with TLA. (A) Contour plots present spleen CD8+ T cells

938 analyzed for IFN $\gamma$ + X CD107a+. (B) Graphs present frequency and absolute # of

939 polyfunctional IFN $\gamma$ +CD107a+CD8+T cells. (C) Contour plots of brain

940 IFN $\gamma$ +GrzB+CD8+ T cells (red numbers are frequency) are presented. (D and E) B6

941 mice were treated or not with 200 ug of anti-NK1.1 starting at D-1 then infected with 10

942 cysts of ME49 strain i.g. Mice were treated every other day with anti-NK1.1. On day 7

943 post infection animals were sacrificed and spleen cells isolated then stimulated with TLA

944 and stained for polyfunctionality (IFN $\gamma$ +CD107a+). (D) Contour plots present CD8+ T

945 cells stained for IFN $\gamma$ + X CD107a+ during acute *T. gondii* infection. (E) Graphs present

946 pooled data from 2 experiments showing frequency (%) and absolute number of IFN $\gamma$ +  
947 CD8+ T cells in spleen. All graphs are mean  $\pm$  SD. Experiments were repeated 3-5

948 independent times with an n=4 mice per group. \* denotes significance with a  $p \leq 0.05$ .

949

950 **Figure 4. NK cells increase CD8+ T cells apoptosis during chronic *T. gondii***

951 **infection.** C57BL/6 mice were infected and some groups at week 5 after infection were

952 treated or not with anti-NK1.1 i.p. as described. Week 5, week 7 non treated and week 7

953 treated infected mice were sacrificed and spleen cells isolated for Annexin V staining and

954 compared to naïve animals. (A) Contour plots present frequency of Annexin V+ CD8+ T

955 cells and graphs present mean  $\pm$  SD. Data presented are from 1 experiment repeated 3  
956 independent times. Significance is denoted by \* with a  $p \leq 0.05$ ,  $n=4-5$  mice per group.

957

958

959 **Figure 5. NKp46+NKG2A+KLRG1+ NK cells are enriched in spleen during chronic**

960 ***T. gondii* infection.** C57BL/6 mice were orally infected with 10 cysts of ME49 and

961 analyzed for the NK cell receptors 2B4, Ly49H, Ly49D, Ly49I, KLRG1, CD94 and

962 NKG2A by flow cytometry. (A) Contour plots present the frequency of CD49b+ X

963 receptor + cells comparing naïve animals to week 5 post infection. Graphs show pooled

964 data from 3 experiments of frequency and absolute number of CD49b+ Receptor+ cells.

965 (B) Mice were infected with either  $1 \times 10^6$  tachyzoites of *csp1-1* i.p. or 10 cysts ME49

966 i.g. At week 5 post infection, lineage-CD49b+NKp46+ cells were analyzed for CD94 X

967 NKG2A. Contour plots present data from one experiment showing frequency of CD94 X

968 NKG2A cell populations. The graph presents data from 1 experiment comparing the

969 frequency of CD94+NKG2A+ cells between naïve, *cps1-1* and ME49 mice. (C) Mice

970 were infected with 10 cysts of ME49 i.p. then spleen cells were analyzed at week 5 post

971 infection for CD49a X CD49b to identify ILC1 compared to NK cells. Contour plot

972 presents the frequency of CD49a X CD49b cells in the CD3- population. (D) Contour

973 plot presents the frequency of CD49a X CD49b cells in the CD3-NKp46+ population.

974 (C-D) Graphs present the frequency of CD49b+CD49a-, CD49b+CD49a+, CD49b-

975 CD49a+ and CD49b-CD49a-. Experiments were repeated independently a minimum of 2

976 times with  $n=3-4$  per group. \* denotes significance with a  $p \leq 0.05$ .

977

978 **Figure 6. NK cells have altered function during chronic *T. gondii* infection.** C57BL/6  
979 or IL-10 reporter TIGER-GFP mice were orally infected with 10 cysts of ME49 and 5  
980 and/or 7 weeks after infection spleen cells analyzed for function. (A) Spleen cells were  
981 stimulated *ex vivo* with plate bound anti-NK1.1 then stained for NK cells (CD3-CD49b+  
982 NKp46+) IFN $\gamma$  and CD107a. Contour plots present frequency data gated on NK cells  
983 and compares IFN $\gamma$  X CD107a. Graphs present the frequency and absolute number of  
984 IFN $\gamma$ + NK cells (top graphs) and CD107a+ NK cells (bottom graphs). Graphs present  
985 mean  $\pm$  SD. (B) Splenic NK cells were assayed for PDL1 expression. Histogram  
986 presents the MFI of PD-L1 on NK cells from week 5 and 7 post infection mice. (C)  
987 Contour plots present the frequency of IL-10 GFP+ NK cells in naïve compared to week  
988 5 post infection mice. (D) Brain cells were isolated and stained for lineage markers,  
989 CD49b and NKp46. Contour plots present the frequency of CD3-NKp46+ cells in the  
990 CNS. Graphs present the pooled data from 2 experiments of frequency of CD3-NKp46+  
991 cells in the CNS. Experiments were repeated at least 2 independent times with an n=3-5  
992 mice per group. Significance is denoted by \* with a  $p \leq 0.05$ .

993

994 **Figure 7. Blockade of NKp46 rescues mice from death caused by CD8+ T cell**  
995 **exhaustion induced parasite reactivation.** C57BL/6 mice were orally infected as above  
996 and total splenocytes were assayed for NKG2A ligand Qa-1b and NKp46 ligand using  
997 soluble NCR1 fused to human Ig Fc. (A) Histograms present the MFI  $\pm$  SD of QA-1b  
998 (top) and NCR1-ligand (bottom) from total splenocytes. (B) Histograms present the MFI  
999  $\pm$  SD of QA-1b (top) and NCR1-ligand (bottom) from CD8+ T cells. (C) Mice were  
1000 infected with 10 cysts of ME49 i.g. and treated or not with 50 ug of anti-NKp46 i.p.

1001 starting at week 5 p.i. Mice were treated every other day for the duration of this  
1002 experiment. The survival graph presents pooled data from 3 independent experiments.  
1003 All experiments were repeated a minimum of 2 times. The log-rank (Mantel-Cox) test  
1004 was used to evaluate survival rates. \* denotes significance with  $p \leq 0.05$ .

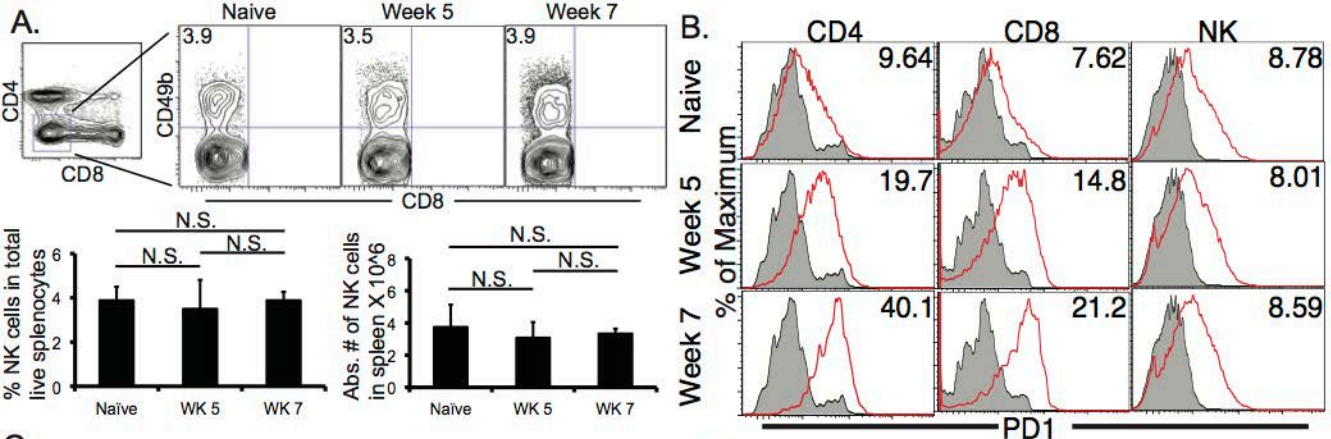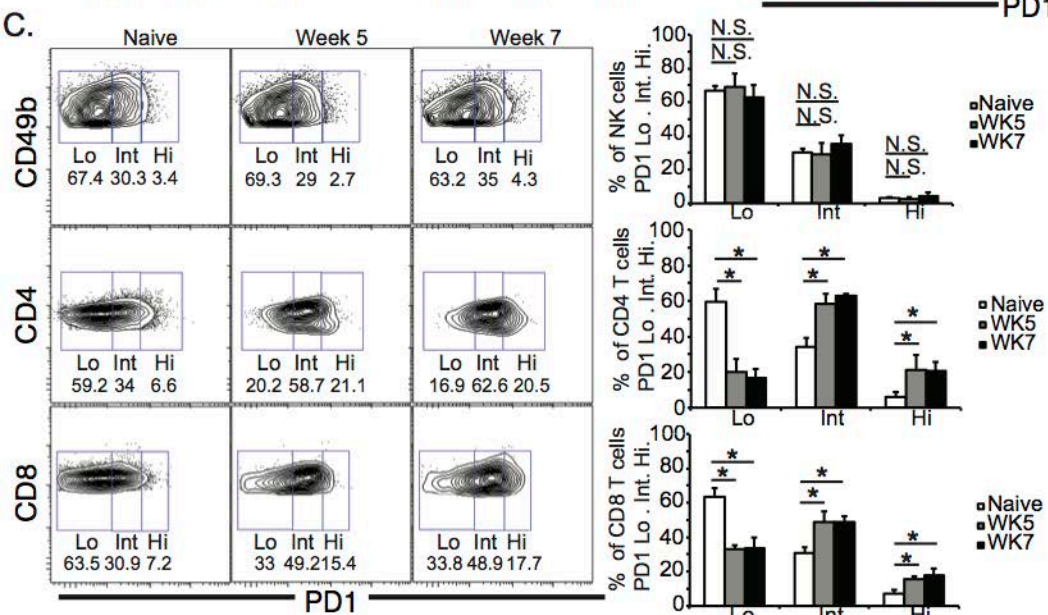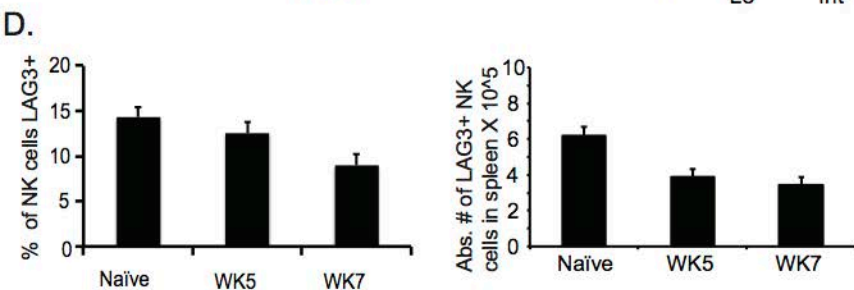

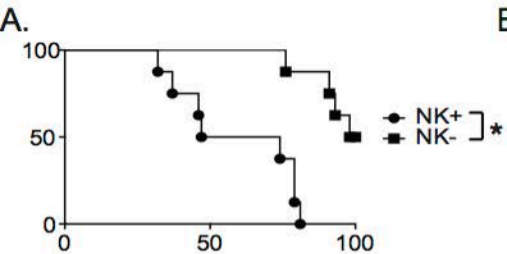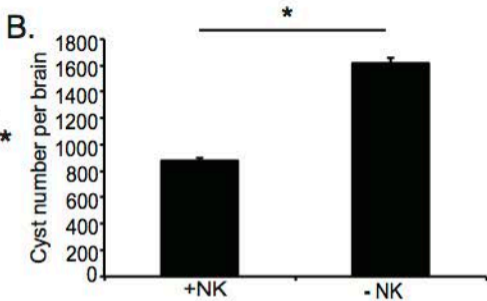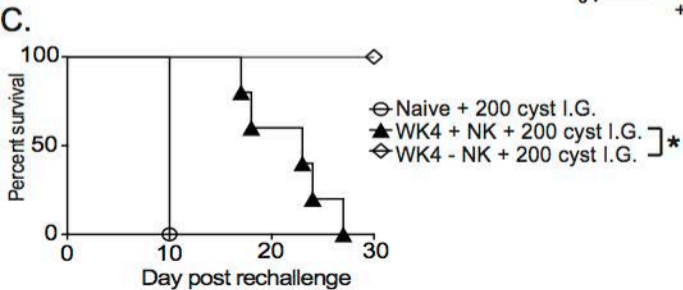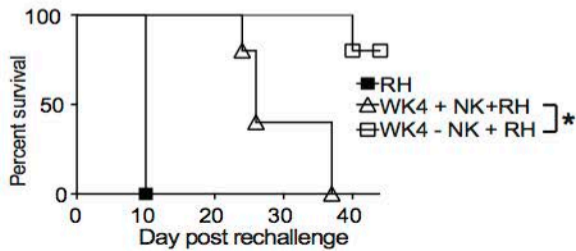

### A. Spleen CD8 T cells

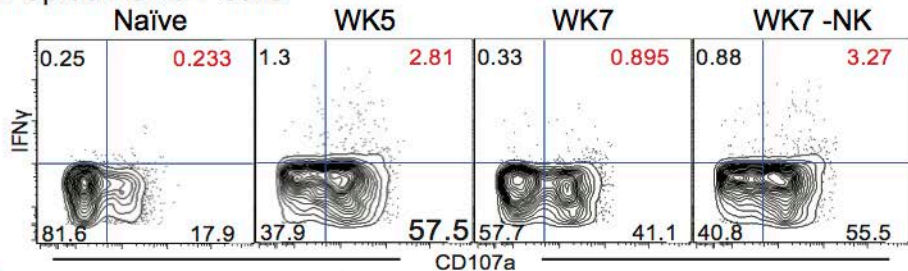

### B.

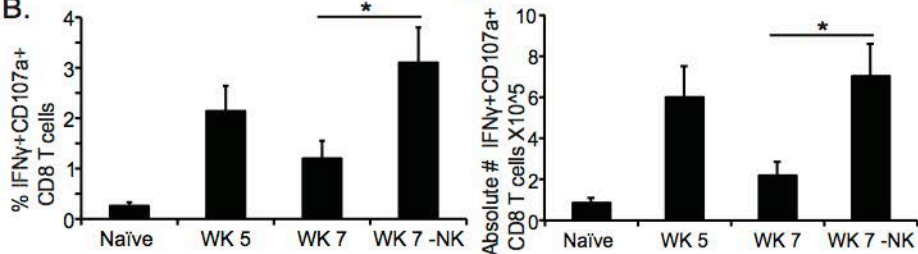

### C. Brain CD8 T cells

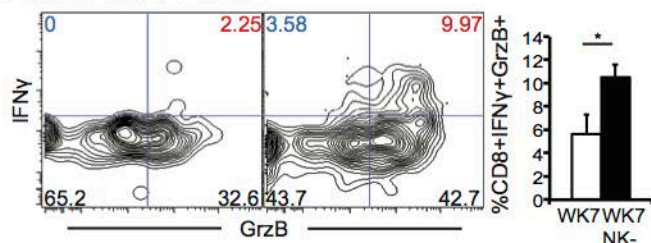

### D.

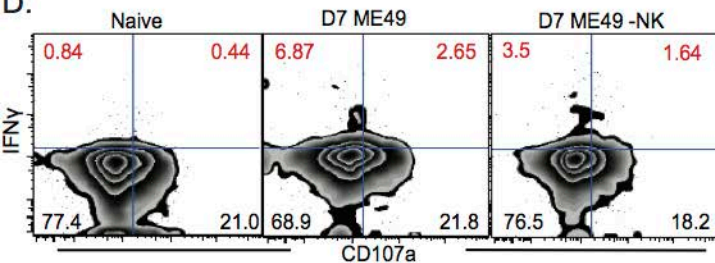

### E.

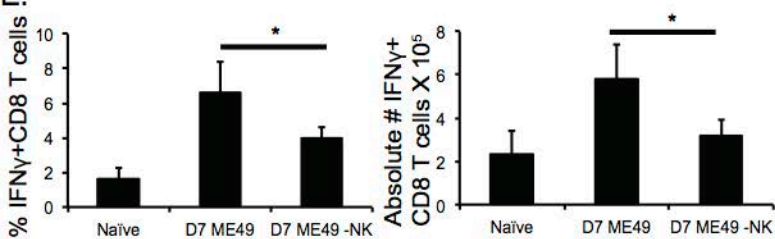



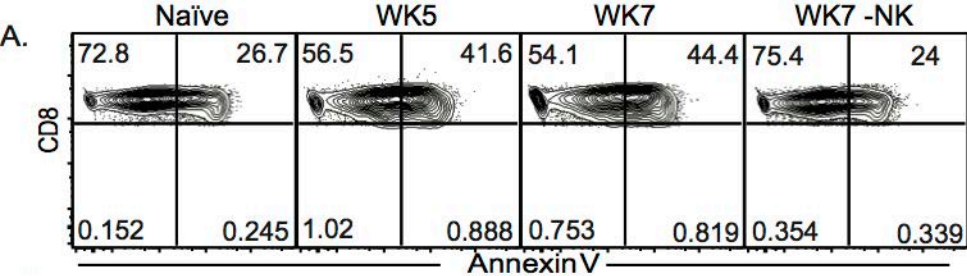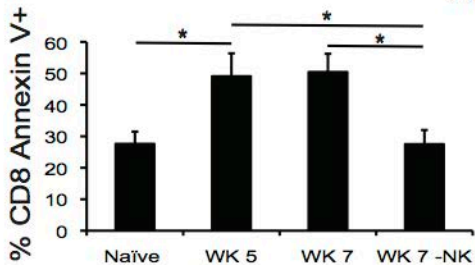



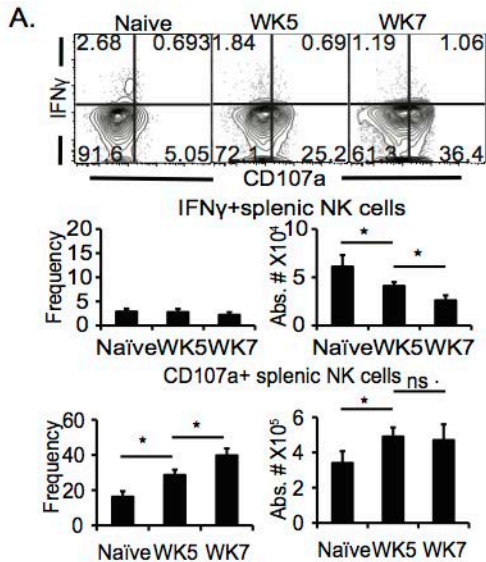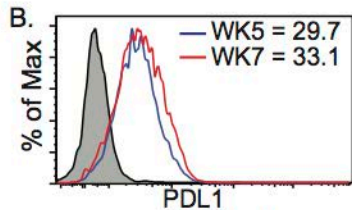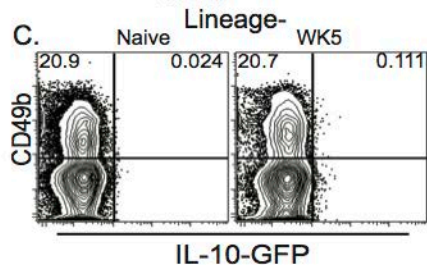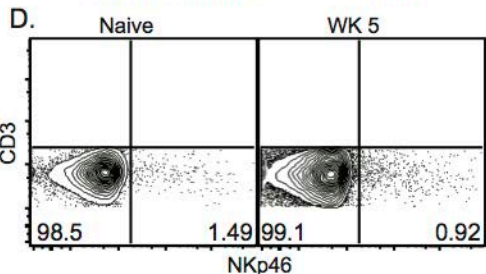

Gated on total live splenocytes

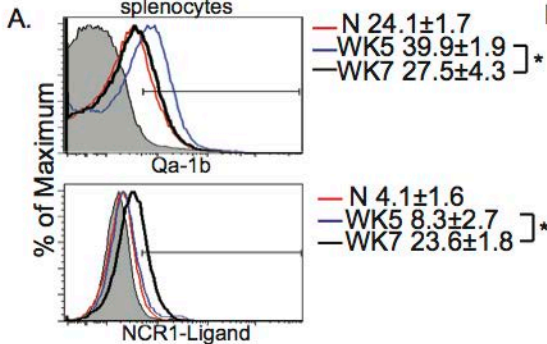

Gated on CD8 T Cells

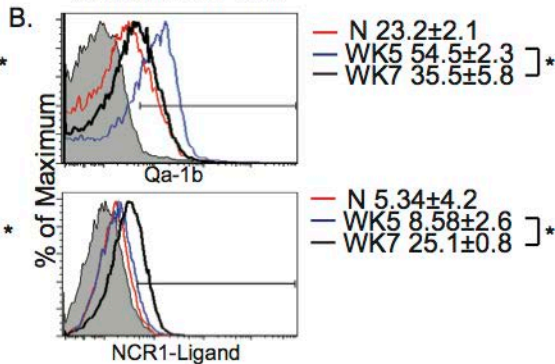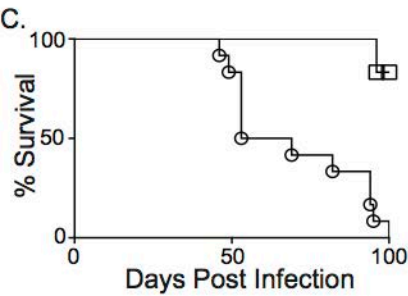

Source: http://biorxiv.org/content/10.1101/864272v1.full.pdf
